# Supplementary material
Source: PubMed Central journal article supplement (PMC539716)

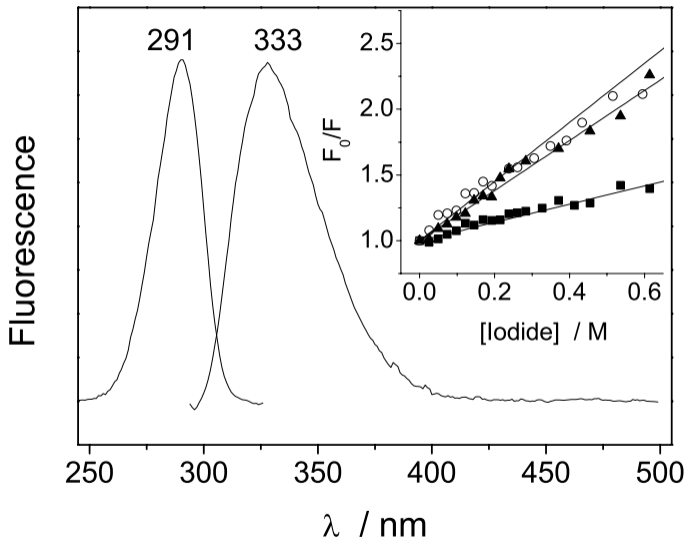

Supplement: pnas_101_51_17675__1.pdf [file pnas_101_51_17675__1.pdf]

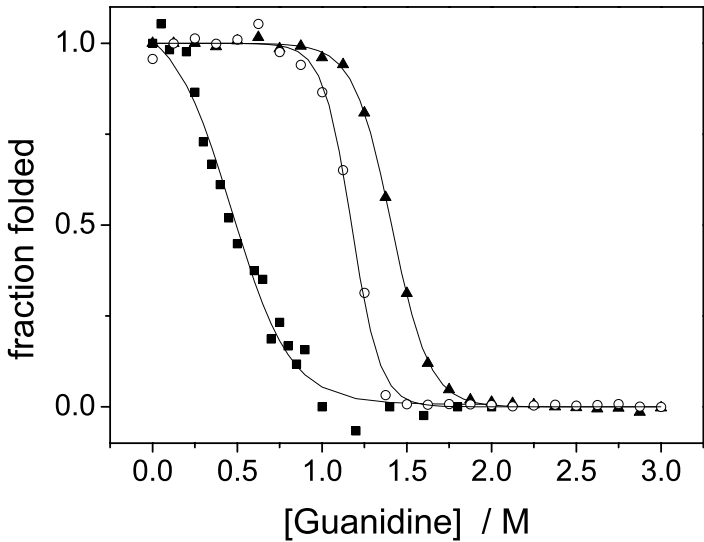

Supplement: pnas_101_51_17675__2.pdf [file pnas_101_51_17675__2.pdf]

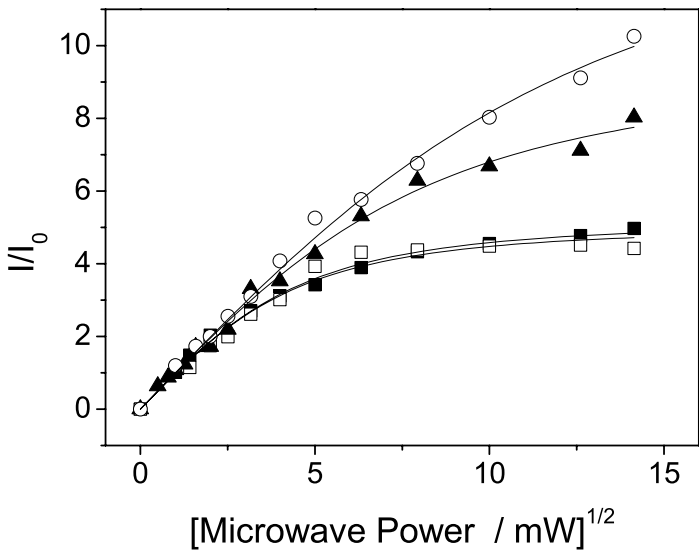

Supplement: pnas_101_51_17675__3.pdf [file pnas_101_51_17675__3.pdf]

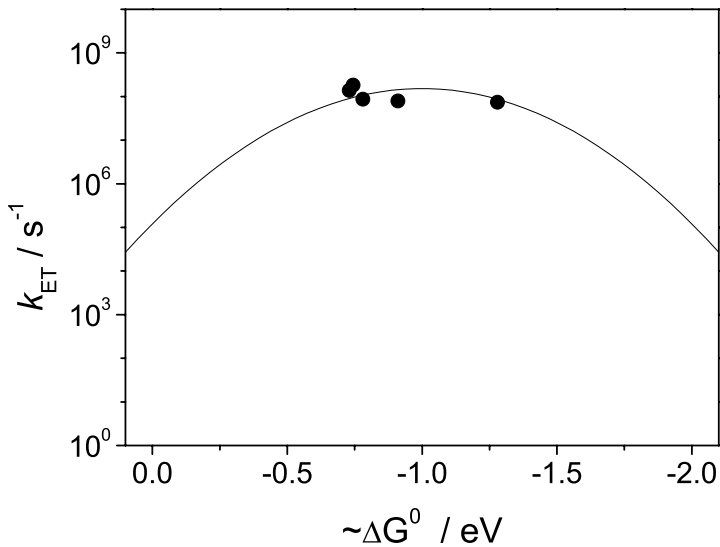

Supplement: pnas_101_51_17675__4.pdf [file pnas_101_51_17675__4.pdf]
